# Supplementary material for: Evaluation of different suspicion indices in identifying patients with Niemann-Pick disease Type C in clinical practice: a post hoc analysis of a retrospective chart review
Source: PubMed Central journal article supplement (PMC6604407; doi:10.1186/s13023-019-1124-3), 2019-07-02
Supplement: 13023_2019_1124_MOESM1_ESM.pdf [file 13023_2019_1124_MOESM1_ESM.pdf]

## Signs and symptoms

| Indicators                               | Visceral                                                                                                                                                                                                      | Score                                                | Neurological                                                                                                                                                               | Score                                                                                                        | Psychiatric                                                                                                                         | Score                                                |
|------------------------------------------|---------------------------------------------------------------------------------------------------------------------------------------------------------------------------------------------------------------|------------------------------------------------------|----------------------------------------------------------------------------------------------------------------------------------------------------------------------------|--------------------------------------------------------------------------------------------------------------|-------------------------------------------------------------------------------------------------------------------------------------|------------------------------------------------------|
| <b>Very strong</b><br>40 points per item |                                                                                                                                                                                                               |                                                      | <ul style="list-style-type: none"> <li>• Vertical supranuclear gaze palsy</li> <li>• Gelastic cataplexy</li> </ul>                                                         | <input type="checkbox"/><br><input type="checkbox"/>                                                         |                                                                                                                                     |                                                      |
| <b>Strong</b><br>20 points per item      | <ul style="list-style-type: none"> <li>• Prolonged unexplained neonatal jaundice or cholestasis</li> <li>• Isolated unexplained splenomegaly (historical and/or current) with/without hepatomegaly</li> </ul> | <input type="checkbox"/><br><input type="checkbox"/> |                                                                                                                                                                            |                                                                                                              | <ul style="list-style-type: none"> <li>• Pre-senile cognitive decline and/or dementia</li> </ul>                                    | <input type="checkbox"/>                             |
| <b>Moderate</b><br>10 points per item    |                                                                                                                                                                                                               |                                                      | <ul style="list-style-type: none"> <li>• Ataxia, clumsiness or frequent falls</li> <li>• Dysarthria and/or dysphagia</li> <li>• Dystonia</li> </ul>                        | <input type="checkbox"/><br><input type="checkbox"/><br><input type="checkbox"/>                             | <ul style="list-style-type: none"> <li>• Psychotic symptoms (hallucinations, delusions and/or thought disorder)</li> </ul>          | <input type="checkbox"/>                             |
| <b>Weak</b><br>5 points per item         |                                                                                                                                                                                                               |                                                      | <ul style="list-style-type: none"> <li>• Acquired and progressive spasticity</li> </ul>                                                                                    | <input type="checkbox"/>                                                                                     | <ul style="list-style-type: none"> <li>• Treatment-resistant psychiatric symptoms</li> <li>• Other psychiatric disorders</li> </ul> | <input type="checkbox"/><br><input type="checkbox"/> |
| <b>Ancillary</b><br>1 point per item     | <ul style="list-style-type: none"> <li>• Hydrops fetalis</li> <li>• Siblings with fatal ascites</li> </ul>                                                                                                    | <input type="checkbox"/><br><input type="checkbox"/> | <ul style="list-style-type: none"> <li>• Hypotonia</li> <li>• Delayed developmental milestones</li> <li>• Seizure (partial or generalised)</li> <li>• Myoclonus</li> </ul> | <input type="checkbox"/><br><input type="checkbox"/><br><input type="checkbox"/><br><input type="checkbox"/> | <ul style="list-style-type: none"> <li>• Disruptive or aggressive behaviour in adolescence and childhood</li> </ul>                 | <input type="checkbox"/>                             |

### Category scores

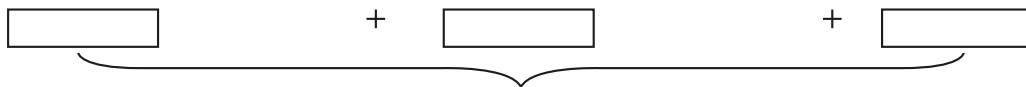

### Category Combination

40 points: Visceral & psychiatric  
 40 points: Visceral & neurological  
 20 points: Neurological & psychiatrics

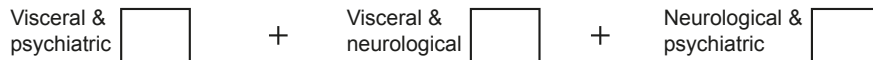

### NP-C family relationship

40 points: Parent/sibling  
 10 points: Cousin

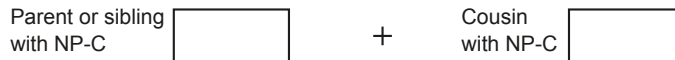

### Risk Prediction Score

= Sum of scores
