# Supplementary material for: Evaluation of different suspicion indices in identifying patients with Niemann-Pick disease Type C in clinical practice: a post hoc analysis of a retrospective chart review
Source: PubMed Central journal article supplement (PMC6604407; doi:10.1186/s13023-019-1124-3), 2019-07-02

| Points | CNS                                         | Spleen                                | Liver                                          | Lung                                           | Natal                                             | Family history                                         |
|--------|---------------------------------------------|---------------------------------------|------------------------------------------------|------------------------------------------------|---------------------------------------------------|--------------------------------------------------------|
| +4     |                                             | Splenomegaly <input type="checkbox"/> |                                                | Pulmonary infiltrates <input type="checkbox"/> |                                                   | Parents or siblings with NP-C <input type="checkbox"/> |
| +3     | Gelastic cataplexy <input type="checkbox"/> |                                       | Prolonged jaundice <input type="checkbox"/>    |                                                |                                                   |                                                        |
| +2     | VSGP <input type="checkbox"/>               |                                       | Direct bilirubinaemia <input type="checkbox"/> |                                                | Foetal oedema or ascites <input type="checkbox"/> |                                                        |
| +1     |                                             |                                       | Hepatomegaly <input type="checkbox"/>          |                                                |                                                   |                                                        |

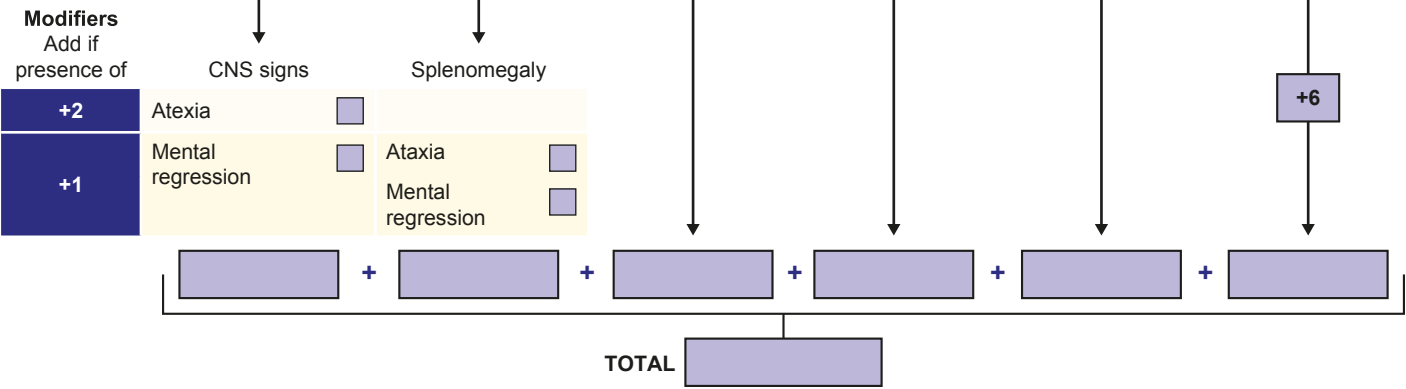

Supplement: 13023_2019_1124_MOESM2_ESM.pdf [file 13023_2019_1124_MOESM2_ESM.pdf]
