# Supplementary material for: Evaluation of different suspicion indices in identifying patients with Niemann-Pick disease Type C in clinical practice: a post hoc analysis of a retrospective chart review
Source: PubMed Central journal article supplement (PMC6604407; doi:10.1186/s13023-019-1124-3), 2019-07-02

**A) Original SI**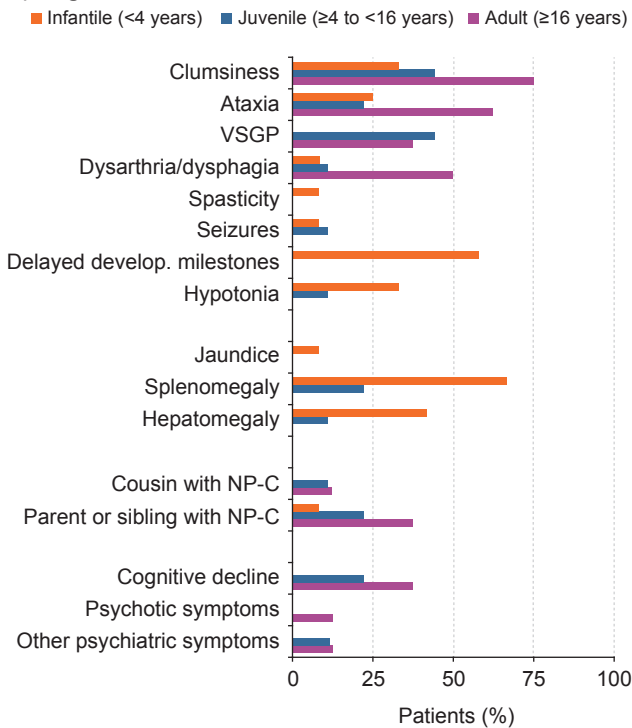**B) 2/7 SI**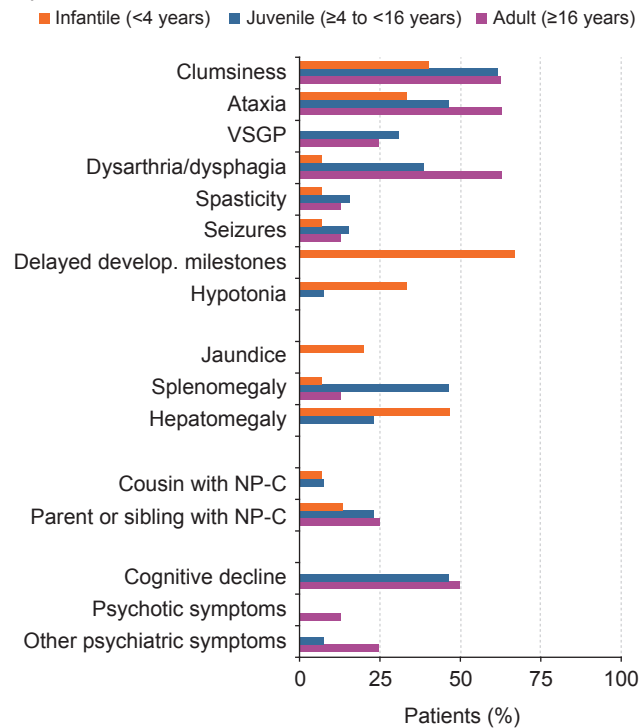**C) 2/3 SI**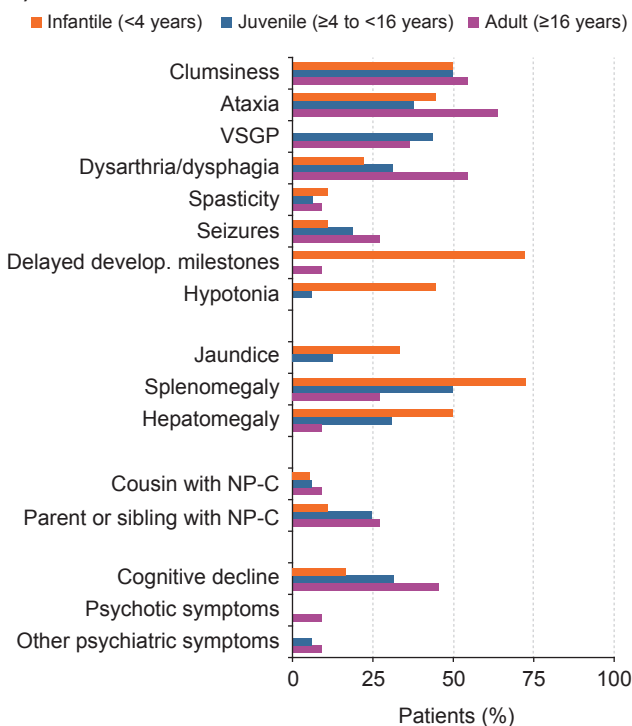**D) Early-Onset SI**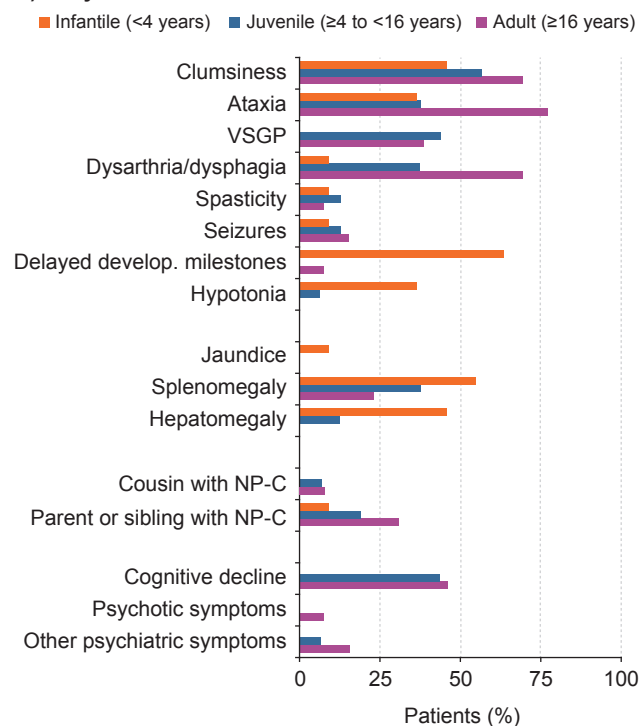

Supplement: 13023_2019_1124_MOESM3_ESM.pdf [file 13023_2019_1124_MOESM3_ESM.pdf]
